# Supplementary material for: Development of an oxygen-gradient system to overcome plasma instabilities during HPLC/ICP-MS measurements using gradient elution
Source: Royal Society of Chemistry journal article supplement (doi:10.1039/c1ja10177c), 2011-01-01

## Supplementary Information

**Figure S1** User surface of the software “Flow-Control”: (a) import function for data tables, (b) window listing the current data table, (c) current interval and start/stop buttons, (d) graphical view of the current flow, (e) trigger activation, (f) direct mass-flow control.

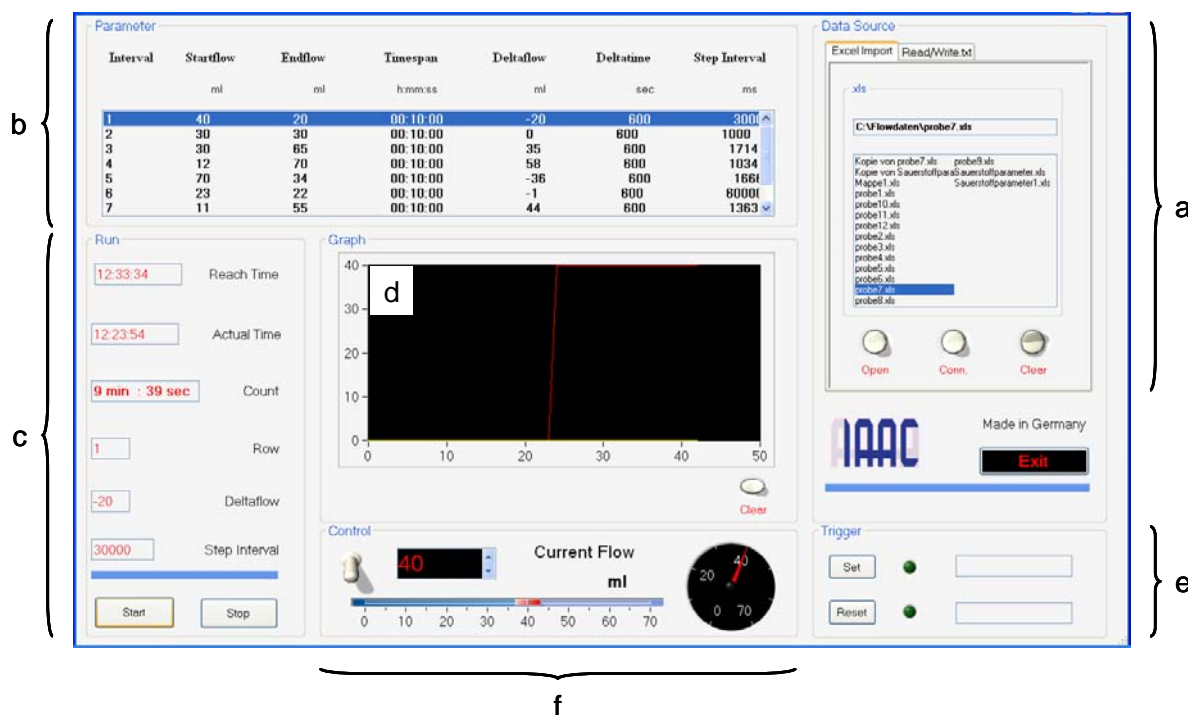

Supplement: c1ja10177c.pdf [file c1ja10177c.pdf]
